# Supplementary material for: Molecular Characterization of Astrocytoma Progression Towards Secondary Glioblastomas Utilizing Patient-Matched Tumor Pairs
Source: MDPI journal article supplement (doi:10.3390/cancers12061696), 2020-06-26
Supplement: s1 [file s1]

## Stability analysis of hierarchical clustering of astrocytoma aCGH profiles

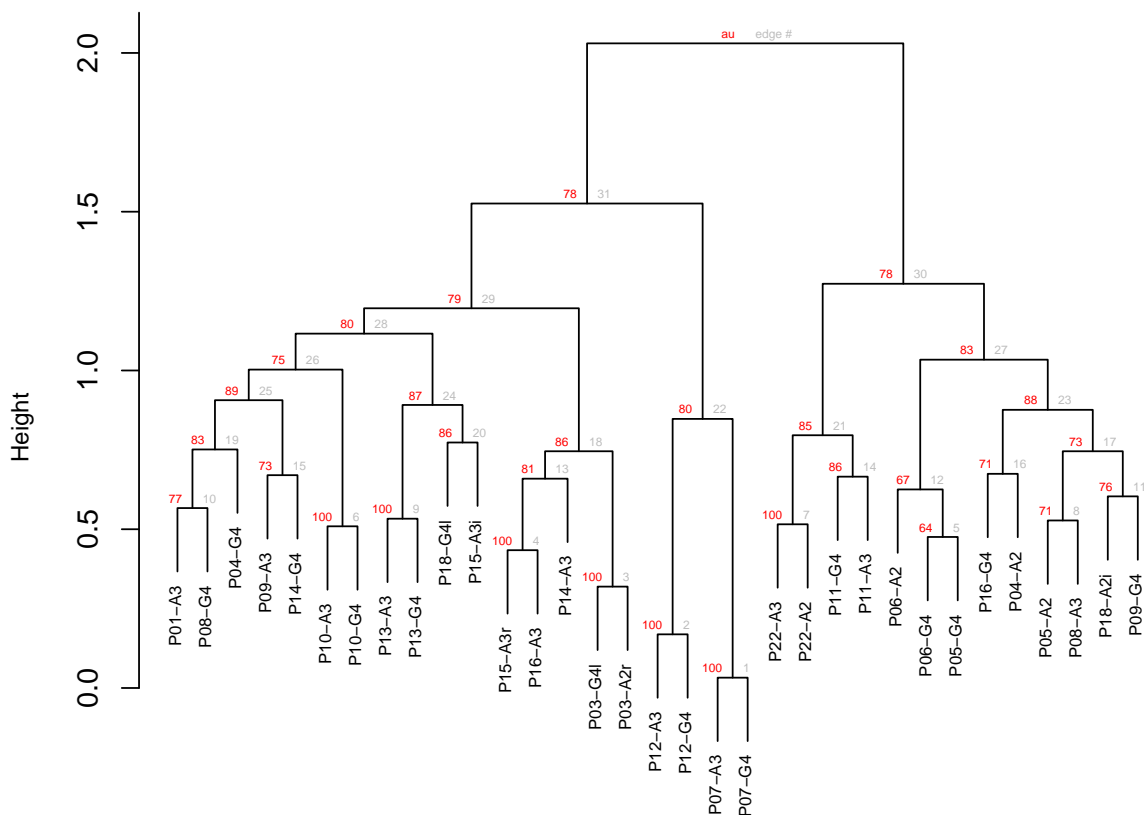

**Figure S1.** Stability analysis of the hierarchical clustering of astrocytoma gene copy number profiles initially shown as column-dendrogram in Figure 2a. The R-package pvclust was used with standard bootstrap settings to analyze the stability of the clusters. Approximately unbiased bootstrap values (AU values) are shown in red and grey values specify the rank of the cluster during creation. Validity of a clusters is the better the closer its AU value is to 100. The three major gene copy number clusters show still good moderate stabilities with AU values ranging from 78 to 80 with respect to the limitations of our small data set along with relatively heterogeneous gene copy number profiles. Almost all patient-matched initial and recurrent tumors that directly clustered together have AU values of 100.
